# Supplementary material for: Kinetic multilayer models for surface chemistry in indoor environments
Source: Royal Society of Chemistry journal article supplement (doi:10.1039/d4em00549j), 2024-10-31
Supplement: d4em00549j1.zip [file d4em00549j1.zip]

## Sheet: Sheet1
Experiment 1					Experiment 2					Experiment 3
Time (s)	Adsorbed limonene (molec cm-2)	Time (s)	Pressure (mTorr)		Time (s)	Adsorbed limonene (molec cm-2)	Time (s)	Pressure (mTorr)		Time (s)	Adsorbed limonene (molec cm-2)	Time (s)	Pressure (mTorr)
0	0	0	0		0	0	0	0		0	0	0	0
10	1146950000000	8	0.510127		10	4649820000000	8	0.531985		10	8018690000000	8	0.17098
20	2944110000000	16	0.636391		20	7664220000000	16	1.04487		20	12195000000000	16	0.380266
30	3667720000000	24	1.08351		30	10870900000000	24	1.30467		30	15848600000000	24	1.5028
40	5234130000000	32	1.12848		40	13303300000000	32	2.31514		40	19499300000000	32	3.13
50	6444110000000	40	1.00618		50	15823300000000	40	3.15144		50	22673700000000	40	5.26643
60	7762360000000	48	0.844867		60	18292200000000	48	3.08948		60	26103800000000	48	5.54339
70	9056980000000	56	0.953662		70	20750000000000	56	3.50201		70	27952700000000	56	6.26933
80	10059100000000	64	2.11063		80	22677300000000	64	4.4532		80	30808300000000	64	7.28766
90	11095200000000	72	1.85181		90	24341400000000	72	4.30171		90	32929500000000	72	8.39959
100	12530300000000	80	1.94539		100	26163400000000	80	5.08729		100	35075800000000	80	9.24296
110	13270600000000	88	2.60871		110	28243900000000	88	6.22022		110	36971600000000	88	10.7267
120	13590700000000	96	1.94087		120	29418100000000	96	5.94587		120	38164200000000	96	10.8168
130	14404000000000	104	1.83071		130	31321800000000	104	5.74621		130	39785000000000	104	11.985
140	15704000000000	112	2.35939		140	32296900000000	112	7.31444		140	41220500000000	112	12.0917
150	15913400000000	120	2.16033		150	33256100000000	120	6.77982		150	42739300000000	120	13.0746
160	16600100000000	128	3.76125		160	34115500000000	128	8.40967		160	43897100000000	128	13.0725
170	17338700000000	136	3.40552		170	34915400000000	136	7.3801		170	45143600000000	136	13.543
180	17769200000000	144	4.13737		180	35869100000000	144	9.07426		180	45529400000000	144	14.8881
190	18356900000000	152	4.22886		190	36241800000000	152	8.7588		190	47084300000000	152	14.745
200	19075900000000	160	4.53728		200	37241600000000	160	9.32075		200	47317900000000	160	15.4498
210	19505000000000	182	4.41807		210	37844200000000	182	10.2565		210	48713000000000	182	15.5313
220	19555400000000	204	4.89721		220	38231900000000	204	10.9728		220	49498300000000	204	16.0641
230	19881600000000	226	5.1364		230	38958200000000	226	11.3856		230	49414700000000	226	17.0626
240	19918100000000	248	5.81228		240	38602100000000	248	11.758		240	50424200000000	248	17.6378
250	20647700000000	270	6.09061		250	39314700000000	270	11.992		250	51150300000000	270	18.4852
260	21187900000000	292	5.72303		260	40176500000000	292	12.2572		260	51369000000000	292	19.5723
270	21384700000000	314	5.68465		270	40065900000000	314	12.6383		270	52309800000000	314	19.7797
280	21263700000000	336	6.18789		280	40164200000000	336	12.1875		280	53014200000000	336	20.2563
290	21012500000000	358	5.95043		290	40306000000000	358	13.1322		290	52848100000000	358	20.5863
300	21738500000000	380	5.96235		300	40675700000000	380	13.2585		300	53239500000000	380	20.9687
320	21749300000000	402	6.59379		320	40887000000000	402	13.6399		320	53723500000000	402	21.0373
340	21926000000000	424	6.66258		340	41165800000000	424	13.8739		340	54931300000000	424	20.6726
360	22175700000000	446	6.60278		360	41685600000000	446	13.5605		360	55304100000000	446	21.2787
380	22389700000000	468	6.73729		380	42110600000000	468	14.6009		380	55752800000000	468	21.4329
400	22858100000000	490	6.85657		400	42064700000000	490	13.9711		400	56086800000000	490	21.1892
420	23013100000000	512	7.49528		420	42238600000000	512	14.2112		420	56305800000000	512	21.4992
440	23124900000000	534	7.47054		440	42526400000000	534	14.2875		440	56714700000000	534	22.1492
460	22990300000000	556	7.36695		460	42497700000000	556	13.6777		460	56664000000000	556	22.1407
480	23034000000000	578	6.75489		480	42532600000000	578	13.642		480	56973800000000	578	22.1253
500	23204200000000	600	6.37481		500	42787800000000	600	13.6447		500	57052900000000	600	21.867
520	23127100000000	622	6.20797		520	42563100000000	622	14.0146		520	57188900000000	622	22.1137
540	23201800000000	644	7.11883		540	42689500000000	644	14.1978		540	57169800000000	644	22.4491
560	23378200000000	666	7.28949		560	42787600000000	666	13.7818		560	57314000000000	666	22.0713
580	23478200000000	688	6.83974		580	43037700000000	688	13.8596		580	57600100000000	688	21.8007
600	23433600000000	710	6.9636		600	42665900000000	710	14.2505		600	57538100000000	710	21.5462
620	23383400000000	732	7.15715		620	42849400000000	732	14.4329		620	57604200000000	732	21.7382
640	23586800000000	1080	6.36705		640	42923300000000	1080	14.5381		640	57597900000000	1080	21.8531
660	23670900000000	1088	5.21046		660	43085500000000	1088	14.2359		660	57330700000000	1088	20.4066
680	23583200000000	1096	5.28547		680	42995500000000	1096	13.193		680	58003400000000	1096	18.2292
700	23537500000000	1104	4.93399		700	42820300000000	1104	10.8367		700	57674600000000	1104	16.6747
720	23162700000000	1112	4.42956		720	43047500000000	1112	11.2748		720	57832800000000	1112	15.0689
740	23707400000000	1120	4.68711		740	42827400000000	1120	9.64534		740	57673400000000	1120	14.4203
760	23612400000000	1128	3.9321		760	43131700000000	1128	8.97523		760	58076500000000	1128	13.0399
780	23539800000000	1136	3.91748		780	43054600000000	1136	8.6235		780	57817900000000	1136	11.7537
800	23664200000000	1144	3.46545		800	42848500000000	1144	7.58895		800	57857400000000	1144	11.7523
820	23774400000000	1152	3.64918		820	43016600000000	1152	7.47725		820	57794700000000	1152	10.1285
840	23787500000000	1160	4.39131		840	42911700000000	1160	7.12561		840	57843500000000	1160	10.027
860	23820700000000	1168	3.20429		860	43310900000000	1168	5.81057		860	57529600000000	1168	7.55883
880	23656900000000	1176	2.97933		880	43069600000000	1176	5.67178		880	57805100000000	1176	8.63137
900	24143500000000	1184	2.91801		900	43101100000000	1184	4.88005		900	57663400000000	1184	7.33592
960	24045300000000	1192	3.90201		960	43214100000000	1192	4.07548		960	57652400000000	1192	7.36707
1080	24327700000000	1200	2.80925		1080	43423400000000	1200	4.14796		1080	57657500000000	1200	5.3965
1080	24235000000000	1208	3.12541		1080	42423400000000	1208	3.51534		1080	57596100000000	1208	6.51183
1090	20120100000000	1216	2.52896		1090	34902400000000	1216	3.67609		1090	51353600000000	1216	5.90578
1100	17917800000000	1224	2.08781		1100	29843600000000	1224	3.87264		1100	44963700000000	1224	5.15108
1110	15553100000000	1232	1.71079		1110	27740100000000	1232	2.64048		1110	40312800000000	1232	5.11499
1120	13979200000000	1240	2.45339		1120	26217100000000	1240	3.04141		1120	35827600000000	1240	6.9524
1130	12902100000000	1262	2.16631		1130	24164600000000	1262	2.64869		1130	32514500000000	1262	4.17855
1140	11406400000000	1284	1.32116		1140	21614400000000	1284	2.31689		1140	29476300000000	1284	3.26848
1150	11077300000000	1306	1.24897		1150	20202000000000	1306	2.09191		1150	26628000000000	1306	2.98543
1160	9862740000000	1328	0.343081		1160	18310400000000	1328	2.0132		1160	24117800000000	1328	2.33181
1170	9345880000000	1350	0.243202		1170	16860100000000	1350	1.89699		1170	22440500000000	1350	1.62676
1180	8493180000000	1372	0.570155		1180	15862800000000	1372	1.45957		1180	20886600000000	1372	1.44997
1190	7720030000000	1394	1.18518		1190	14117100000000	1394	1.61686		1190	19241200000000	1394	2.00666
1200	7450130000000	1416	0.734842		1200	13408000000000	1416	1.37908		1200	17516100000000	1416	1.50212
1210	6646020000000	1438	0.543636		1210	12849300000000	1438	0.939025		1210	16517200000000	1438	0.870793
1220	6500950000000	1460	0.894183		1220	11416500000000	1460	0.73039		1220	15370900000000	1460	0.831446
1230	6193690000000	1482	0.856902		1230	11043300000000	1482	0.553832		1230	14205700000000	1482	0.732302
1240	5737120000000	1504	1.13468		1240	10682700000000	1504	0.306207		1240	13360000000000	1504	0.804089
1250	5157850000000	1526	0.0298477		1250	10298400000000	1526	0.345844		1250	12582600000000	1526	0.915545
1260	4566280000000	1548	-0.526447		1260	9407570000000	1548	0.606614		1260	11649700000000	1548	0.696914
1270	4120010000000	1570	-0.419166		1270	8736490000000	1570	0.280745		1270	11223200000000	1570	0.285401
1280	3295870000000	1592	-0.59749		1280	8221970000000	1592	0.590678		1280	10816400000000	1592	0.670991
1290	3241570000000	1614	-0.327029		1290	7878860000000	1614	0.730026		1290	9846360000000	1614	0.564185
1300	2894080000000	1636	0.00127713		1300	7498820000000	1636	0.663571		1300	9529120000000	1636	-0.0304256
1310	3016700000000	1658	0.4057		1310	6977570000000	1658	0.0732073		1310	8528240000000	1658	0.316594
1320	2805600000000	1680	0.15017		1320	6681430000000	1680	-0.277577		1320	7326490000000	1680	0.560861
1330	2689640000000	1702	0.26885		1330	6070860000000	1702	-0.0534598		1330	7435550000000	1702	-0.00643827
1340	2862300000000	1724	0.00438175		1340	5904980000000	1724	-0.208003		1340	7386960000000	1724	-0.36153
1350	2931540000000	1746	-0.158511		1350	5646860000000	1746	-0.428503		1350	7189320000000	1746	-0.337011
1360	2617640000000	1768	0.129833		1360	5538410000000	1768	-0.285775		1360	6728760000000	1768	0.0799394
1370	2778690000000	1790	-0.464202		1370	5035990000000	1790	-0.588555		1370	6108640000000	1790	-0.416131
1380	2262210000000	1812	-0.0104686		1380	5223660000000	1812	0.375078		1380	5793740000000	1812	-0.370055
1400	2041100000000				1400	4547330000000				1400	5657070000000
1420	1906080000000				1420	3988880000000				1420	5152870000000
1440	1915150000000				1440	3993060000000				1440	4776440000000
1460	1747090000000				1460	3580290000000				1460	4264940000000
1480	1674510000000				1480	3076690000000				1480	4177300000000
1500	1583800000000				1500	3011690000000				1500	4010480000000
1520	1441400000000				1520	3118240000000				1520	3480080000000
1540	1427250000000				1540	3146080000000				1540	3293850000000
1560	1499540000000				1560	2934870000000				1560	3591190000000
1580	1376790000000				1580	2741610000000				1580	3022050000000
1600	1365740000000				1600	2733490000000				1600	3124110000000
1620	1229750000000				1620	2647990000000				1620	2895010000000
1640	1227130000000				1640	2504150000000				1640	3063880000000
1660	1151680000000				1660	2542110000000				1660	2810950000000
1680	992900000000				1680	2418070000000				1680	2665070000000
1700	985896000000				1700	2224810000000				1700	2507930000000
1720	1119730000000				1720	2316730000000				1720	2685660000000
1740	1083990000000				1740	2219160000000				1740	2421110000000
1760	1070400000000				1760	2152550000000				1760	2592800000000
1780	978010000000				1780	2002510000000				1780	2106770000000
1800	830804000000				1800	2039420000000				1800	2494500000000
1820	742939000000				1820	2134510000000				1820	2498740000000
1840	640445000000				1840	1945590000000				1840	2492700000000
1860	641149000000				1860	1987690000000				1860	2223820000000
1880	386173000000				1880	1990360000000				1880	2288760000000
1900	353043000000				1900	2029990000000				1900	2335850000000
1920	375452000000				1920	2142180000000				1920	2151370000000
1940	260213000000				1940	1941990000000				1940	2054060000000
1960	300200000000				1960	1653320000000				1960	2203310000000
1980	427833000000				1980	1668550000000				1980	2055020000000
