# Supplementary material for: Kinetic multilayer models for surface chemistry in indoor environments
Source: Royal Society of Chemistry journal article supplement (doi:10.1039/d4em00549j), 2024-10-31
Supplement: d4em00549j1.zip [file Data for MOCCIE.xlsx]

## Sheet: All mean concentrations Ks
	DEHP	Substrate: Aluminum						See Wu et al. 2017 (ES&T)
	T = 25°C	time (h)	mean surface concentration (ng)	std.dev. (ng)	sampling date
	n = 2	46.7	306.628	16.7005	2016-02-23
		23.3	154.456	23.8998	2016-02-23
		120	337.552	29.1793	2016-03-01
		94.5	396.718	18.1348	2016-03-04
		71.6	271.958	78.4617	2016-03-04
		188	415.533	38.7507	2016-04-27
		167.25	374.888	4.75583	2016-04-27
		333.5	437.365	67.0965	2016-05-27
		237.8	495.769	35.566	2016-05-27
		309.67	459.475	56.9543	2016-06-14
		287.5	538.721	97.0604	2016-06-14
	DEHP	Substrate: Smooth glass
	T = 25°C	time (h)	mean surface concentration (ng)	std.dev. (ng)	sampling date
	n = 2	93.7	360.073	58.1906	2016-03-18
		70.7	209.673	4.20195	2016-03-18
		47.25	143.431	2.0148	2016-03-18
		23.25	71.1517	1.32527	2016-03-18
		259.7	717.276	1.16904	2016-04-19
		192	483.477	16.1167	2016-04-19
		162	400.451	13.7614	2016-04-19
		335.9	341.041	27.7002	2016-05-27
		237.6	459.664	34.5329	2016-05-27
	DEHP	Substrate: Rough glass
	T = 25°C	time (h)	mean surface concentration (ng)	std.dev. (ng)	sampling date
	n = 2	164.5	917.07	20.7148	2016-04-12
		140.75	704.101	8.73273	2016-04-12
		120.35	568.639	1.95807	2016-04-12
		96.58	435.897	9.00148	2016-04-12
		71	446.818	139.735	2016-04-18
		46.17	164.849	6.21639	2016-04-18
		287	1362.15	16.5	2016-04-25
		256.75	1292.52	3.19031	2016-04-25
	DEHP	Substrate: Stainless steel #1
	T = 25°C	time (h)	mean surface concentration (ng)	std.dev. (ng)	sampling date
	n = 2	139.9	490.903	13.6104	2016-03-24
		65.5	198.905	8.221	2016-03-24
		47.5	130.247	1.3141	2016-03-24
		23.9	56.7244	6.45901	2016-03-24
		188	644.035	59.4162	2016-04-01
		166.83	546.037	4.35075	2016-04-01
		94	325.94	23.6944	2016-04-01
		47	150.601	20.6179	2016-04-01
		256.5	908.492	42.4752	2016-04-25
		238.8	762.035	57.4726	2016-04-25
	DEHP	Substrate: Acrylic plastic
	T = 25°C	time (h)	mean surface concentration (ng)	std.dev. (ng)	sampling date
	n = 2	94	355.066	0	2016-05-10
		46.75	206.778	0	2016-05-10
		310	455.688	57.1086	2016-05-26
		213.8	465.727	57.2621	2016-05-26
		257.2	361.394	23.4005	2016-06-07
		163	304.132	1.77887	2016-06-07
	DEHP	Substrate: Steel
	T = 25°C	time (h)	mean surface concentration (ng)	std.dev. (ng)	sampling date
	n = 2	239.57	1793.39	305.694	2016-10-14
		191.88	1157.81	89.8939	2016-10-14
		91.58	540.631	30.6411	2016-10-14
		71.9	353.789	22.9083	2016-10-14
		23.42	153.136	5.36068	2016-10-14
		148.95	771.429	53.959	2016-10-31
		168	965.034	65.5355	2016-11-04
		89.5	506.764	11.5858	2016-11-04
		46	206.241	0.45111	2016-11-04
	DEHP	Substrate: Stainless steel #2
	T = 25°C	time (h)	mean surface concentration (ng)	std.dev. (ng)	sampling date
	n = 2	91.43	514.004	53.4713	2016-10-14
		71.4	343.478	28.4137	2016-10-14
		23	104.149	5.73567	2016-10-14
		149.05	600.903	36.6427	2016-10-31
		168	603.543	70.2003	2016-11-04
		89.5	455.798	13.2542	2016-11-04
		46	198.863	10.2605	2016-11-04

## Sheet: Measurements C0-y0
							See Eichler et al. 2018 (ES&T)
	Backpacks	RO-b	t (h)	DEHT mean surface conc. (ng)	DEHT std dev (ng)
		n=2	172.25	1114.43	59.9491		All backpack samples except WA-b2: Surface material/substrate = stainless steel #2, diffusion chamber height = 0.01" (SS shim)
			148.917	1229.49	93.5609		WA-b2: Surface material/substrate = steel, diffusion chamber height = 0.01" (SS shim)
			125.283	708.149	20.444		T = 25°C
			101.667	644.833	36.3907
			77.5	545.619	83.2546
		ST-b	t (h)	DIDP mean surface conc. (ng)	DIDP std dev (ng)
		n=2	164	160.532	4.6122
			144.317	216.699	70.1081
			122.167	131.31	1.58517
			73.4667	56.4389	0.450435
			47.0833	37.548	8.07886
			25.2	18.5341	4.94302
		TA-b	t (h)	DEHP mean surface conc. (ng)	DEHP std dev (ng)	DEHA mean surface conc. (ng)	DEHA std dev (ng)
		n=2	173.583	29.5963	0.789406	1972.47	257.197
			143.583	25.512	2.8733	2365.37	21.4754
			125.933	24.2085	7.10976	2162.79	614.821
			101.75	20.6438	6.71131	1770.98	500.846
			76.0833	14.0865	0.523738	1514.23	141.542
			27.25	7.38142	0.86156	863.484	145.377
		TM-b	t (h)	DEHT mean surface conc. (ng)	DEHT std dev (ng)	DINP mean surface conc. (ng)	DINP std dev (ng)
		n=2	190.733	365.374	39.6258	374.545	2.00222
			167.267	279.681	30.7515	239.291	36.8633
			145.367	272.707	6.58464	210.685	22.7321
			96.4333	301.965	8.14002	20.1327	14.1736
			70.0833	284.449	54.5144	23.8277	6.42393
			48.2	272.112	8.46138	-3.27909	6.61695
			24.3833	208.506	13.2493	3.93119	14.8812
		WA-b1	t (h)	DEHT mean surface conc. (ng)	DEHT std dev (ng)	DEHA mean surface conc. (ng)	DEHA std dev (ng)
		n=2	189.633	482.407	11.9706	1032.2	37.0894
			168.383	362.659	16.116	710.962	173.641
			143.633	324.21	1.53976	591.667	121.679
			119.8	306.832	19.9023	624.765	101.972
			96.3333	241.072	5.64631	710.779	99.3514
			47.1167	172.559	0.0997623	554.626	5.54517
			18.4	141.191	0.727886	339.46	32.4831
		WA-b2	t (h)	DEHP mean surface conc. (ng)	DEHP std dev (ng)	DEHT mean surface conc. (ng)	DEHT std dev (ng)	DIDP mean surface conc. (ng)	DIDP std dev (ng)	DINP mean surface conc. (ng)	DINP std dev (ng)	DINCH surface conc. mean (ng)	DINCH std dev (ng)
		n=2	451.183	770.54	55.6597	1047.44	27.7272	5.48505	11.9196	256.681	20.1826	49.0578	7.57406
			624.15	571.533	81.9387	711.659	33.0287	4.60656	0.798941	223.793	15.9011	33.6078	7.41955
			312.3	564.516	61.7874	672.274	128.33	2.91769	1.21628	214.041	19.8465	33.7969	3.43788
			239	556.535	33.7233	574.734	19.5179	-3.39436	13.6768	174.891	15.612	30.338	8.93723
			162.5	363.976	24.2273	327.743	20.0963	12.4356	4.66452	180.026	14.4638	23.7053	0.64647
			95.1833	310.049	5.77672	231.098	5.67203	0.490738	8.23862	112.122	2.04915	10.5883	1.93803
	Toys	Turtle TA-t1	t (h)	DEHT surface conc. (ng)	ATBC surface conc. (ng)
		n=1	316.05	1853.49	63.311		All toy samples: Surface material/substrate = steel, diffusion chamber height = 0.01" (SS shim), no dublicate samples
			266.733	1224.71	85.7347
			189.817	795.199	122.722
			144.25	542.888	55.6433
			96.9	427.795	115.874
			46.5833	250.963	57.0328
		Giraffe TA-t2	t (h)	DEHT surface conc. (ng)	ATBC surface conc. (ng)
		n=1	316.217	988.02	438.51
			266.9	876.558	437.385
			189.983	1100.11	553.677
			144.417	823.135	461.77
			97.0667	537.481	478.977
			24.9833	224.542	203.79
			46.5833	214.05	445.11
		Small dinosaur DO-t1	t (h)	DEHT surface conc. (ng)
		n=1	290.25	997.485
			213.533	944.67
			167.867	666.671
			120.533	612.906
			22.8333	182.298
			46.1667	208.914
		Big dinosaur DO-t1	t (h)	DEHT (ng)
		n=1	290.25	847.999
			213.533	763.177
			167.867	513.358
			120.533	435.599
			48.4333	184.21
			24	247.432
