# Supplementary material for: Kinetic multilayer models for surface chemistry in indoor environments
Source: Royal Society of Chemistry journal article supplement (doi:10.1039/d4em00549j), 2024-10-31
Supplement: d4em00549j1.zip [file Measurements.xlsx]

## Sheet: Sheet1
O3 time (s)	O3 conc. (ppb)	6-MHO time (s)	6-MHO conc. (ppb)	4-OPA time (s)	4-OPA conc. (ppb)		Measurements were read from graphs in Wisthaler and Weschler, PNAS, 107, 6568-6575 (2010)
50.8	31.2602	159	0.0178362	371	0.00160976
212	30	263	0.107814	104	0.115854
214	28.7805	261	0.230428	739	0.14065
322	27.3171	257	0.418437	1160	0.214634
378	25.935	571	0.639324	1110	0.304472
486	24.4715	676	0.696604	1530	0.247561
647	23.4146	990	0.876619	1690	0.329268
808	21.9106	989	0.974711	1630	0.386585
1180	20.8537	1090	1.04834	2160	0.395122
1550	19.9593	1140	1.15464	2370	0.47561
1710	20.6911	1300	1.26099	2530	0.50813
1980	19.1463	1670	1.28573	2110	0.52439
2190	18.8211	1830	1.34304	2640	0.609756
2620	18.1707	2040	1.44942	3010	0.674797
3040	18.4959	2410	1.44963	3270	0.650407
3460	18.3333	2570	1.53147	3640	0.747967
4200	17.6829	2570	1.62138	4120	0.772358
4680	16.9512	2940	1.58072	3740	0.821138
5050	16.7886	3040	1.65435	3370	0.796748
5100	17.5203	3410	1.62186	4010	0.861789
5900	18.7805	3410	1.69543	4220	0.918699
6530	18.9431	3940	1.67938	4480	0.902439
7010	18.7805	3570	1.74457	4590	0.853659
7590	18.5366	4420	1.7287	4800	0.943089
8230	17.8862	3990	1.79385	5220	1
8650	17.8049	4310	1.84308	5120	1.06504
9180	17.6423	4630	1.80239	5590	0.95935
9710	17.1545	5210	1.77002	5700	1.03659
10500	16.748	5630	1.81931	5860	1.07724
11100	17.1545	5630	1.90105	5590	1.06911
12000	17.0732	5420	1.86006	6490	1.15041
12900	17.1545	5000	1.93339	5800	1.22358
13500	16.6667	6000	1.99118	6170	1.28049
14000	16.4228	6580	2.04873	6650	1.24797
		6370	2.09766	6230	1.23984
		6840	2.13062	6750	1.29675
		7320	2.12272	7230	1.2561
		6790	2.17147	7500	1.2561
		7270	2.21261	7870	1.31301
		7580	2.25366	7180	1.36992
		7900	2.27019	7440	1.32927
		8010	2.36017	6860	1.40244
		8380	2.30316	7650	1.39431
		8690	2.40143	7390	1.4187
		8700	2.24612	8340	1.41057
		9120	2.27905	8020	1.45122
		9280	2.33636	7760	1.51626
		9010	2.20542	8440	1.50407
		9440	2.19749	8650	1.56911
		9540	2.27929	9080	1.63415
		9810	2.25492	9080	1.52846
		10300	2.30424	9400	1.60163
		10200	2.3614	9560	1.52846
		10800	2.40263	9710	1.60163
		10500	2.22264	10200	1.5935
		10700	2.31265	10100	1.66667
		11300	2.25576	9980	1.73984
		11400	2.16591	10600	1.70732
		11800	2.25603	10900	1.60163
		11800	2.12527	11200	1.64228
		12300	2.19094	11100	1.78862
		12000	2.29705	11400	1.84553
		12600	2.30556	11700	1.73984
		13100	2.33038	11900	1.78862
		13200	2.2405	12100	1.70732
		13600	2.21621	12400	1.77236
		13800	2.28173	12300	1.84959
		14100	2.3064	12700	1.91463
		13700	2.33886	12800	1.80081
				14100	1.80894
				14300	1.86585
				13700	1.89024
				13700	1.95528
				13100	1.9878
				13500	2.03659
				13900	2.07724
