# Supplementary material for: Kinetic multilayer models for surface chemistry in indoor environments
Source: Royal Society of Chemistry journal article supplement (doi:10.1039/d4em00549j), 2024-10-31
Supplement: d4em00549j2.pdf [file d4em00549j2.pdf]

## Supporting information

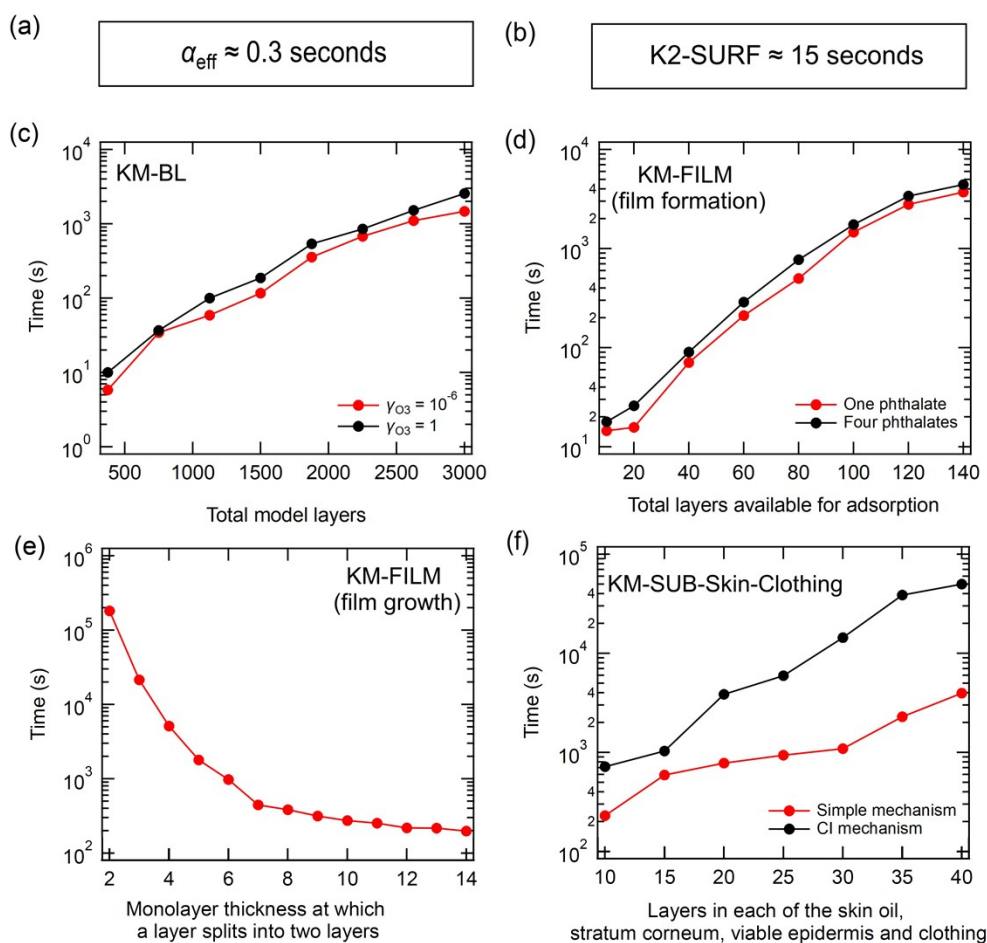

**Figure S1:** The computational time needed to run a single parameter set for the different models. These were calculated using the ‘Run and Time’ button in Matlab. The `maxNumCompThreads(1)` function was used to limit the number of computational threads to one for each simulation and the results were obtained using the following Processor: Intel(R) Core(TM) i7-1065G7 CPU @ 1.30GHz 1.50 GHz. A single value is given for  $\alpha_{\text{eff}}$  and K2-SURF as these contain a fixed number of layers. For  $\alpha_{\text{eff}}$  the model was run without outputting a figure. In panel (c) the layer numbers were set to a 1:2 ratio for the layers closest to the surface and further away from the surface. In panel (d) the one phthalate simulation was performed for DEHP adsorbing on aluminum (JJ=1 in the model) and the simulation with four phthalates was performed for DEHP, DEHT, DINP and DINCH adsorbing on steel (JJ=13 in the model). In panels (d) and (e) the number of layers in the boundary layer were set to 10 and 20, respectively. In panel (e) the layers were set to merge if a layer thickness decreased to less than half a monolayer.

**KM-SUB-Skin-Clothing: Simple mechanism = colored lines, CI mechanism = grey lines**

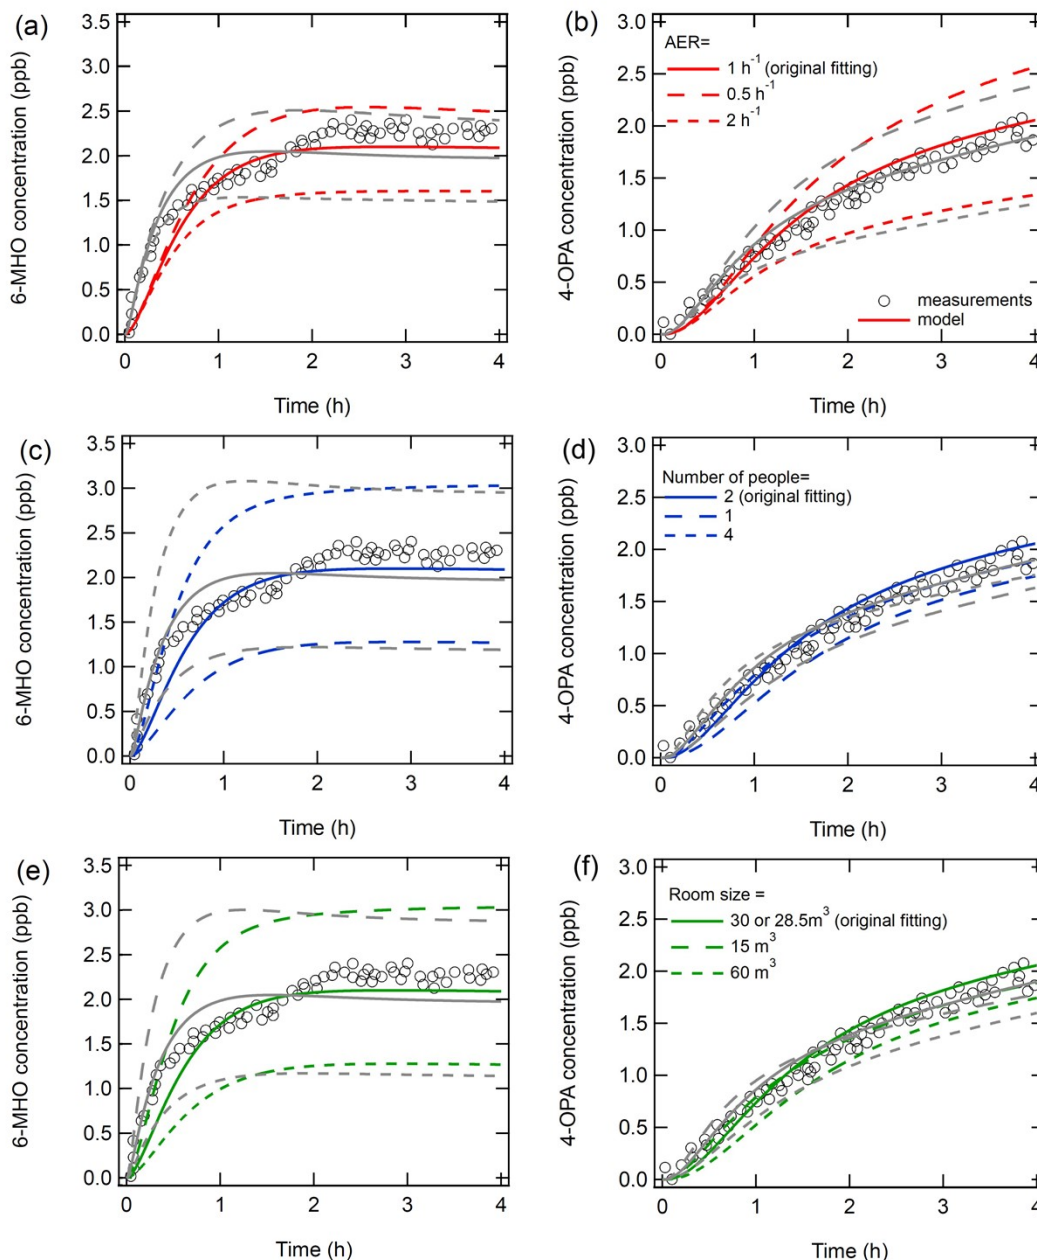

**Figure S2:** Mixing ratios of 6-MHO and 4-OPA as simulated by the KM-SUB-Skin-Clothing model with the simplified reaction mechanism and more complex CI mechanism. Measurements are from Wisthaler and Weschler (2010)<sup>14</sup> and model parameters can be found in Lakey et al.<sup>62</sup> and Lakey et al. (2023)<sup>63</sup>. Sensitivity tests were performed to investigate the impact of (a-b) air-exchange rate, (c-d) the number of people and (e-f) the room size on the gas-phase concentration of (a, c, e) 6-MHO and (b, d, f) 4-OPA. Note that the reaction rate coefficient of CI with carboxylic acids was reported as  $2.7 \times 10^{-20} \text{ cm}^3 \text{ s}^{-1}$  in Lakey et al. (2023)<sup>63</sup> but was actually set to  $1.8 \times 10^{-20} \text{ cm}^3 \text{ s}^{-1}$  for Fig. S5 of that publication and is set to that value here. The difference between the rate coefficients makes a small but noticeable difference to the fitting for the CI mechanism.

**Table S1:** Parameters included in the models.

| <b>Symbol</b>          | <b>Meaning</b>                                                             | <b>Unit</b>                 |
|------------------------|----------------------------------------------------------------------------|-----------------------------|
| $[X]_{bk}$             | Bulk concentration of X in layer $k$                                       | $\text{cm}^{-3}$            |
| $[X]_{bl}$             | Concentration of X in the boundary layer                                   | $\text{cm}^{-3}$            |
| $[X]_{bz}$             | Concentration of X in bulk layer $z$                                       | $\text{cm}^{-3}$            |
| $[X]_{cl,condensed,j}$ | Concentration of X in layer $j$ of the condensed-phase clothing            | $\text{cm}^{-3}$            |
| $[X]_{cl,gas,j}$       | Concentration of X in layer $j$ of the gas-phase clothing                  | $\text{cm}^{-3}$            |
| $[X]_g$                | Concentration of X in the gas phase                                        | $\text{cm}^{-3}$            |
| $[X]_{g1}$             | Concentration of X in layer 1 of the boundary layer                        | $\text{cm}^{-3}$            |
| $[X]_{gap}$            | Concentration of X in the gap between the clothing and the skin            | $\text{cm}^{-3}$            |
| $[X]_{gm}$             | Concentration of X in layer $m$ of the boundary layer                      | $\text{cm}^{-3}$            |
| $[X]_{gm+1}$           | Concentration of X in layer $m + 1$ of the boundary layer                  | $\text{cm}^{-3}$            |
| $[X]_{gm+n+1}$         | Concentration of X in layer $m + n + 1$ of the boundary layer              | $\text{cm}^{-3}$            |
| $[X]_{gs}$             | Concentration of X in the gas phase next to the skin or other surface      | $\text{cm}^{-3}$            |
| $[X]_{oil,j}$          | Concentration of X in layer $j$ of the skin oil                            | $\text{cm}^{-3}$            |
| $[X]_{s,j}$            | Adsorbed surface concentration of X in layer $j$                           | $\text{cm}^{-2}$            |
| $[X]_{s,oil}$          | Concentration of X adsorbed to the skin oil surface                        | $\text{cm}^{-3}$            |
| $[X]_{sc,j}$           | Concentration of X in layer $j$ of the stratum corneum                     | $\text{cm}^{-3}$            |
| $[X]_{ve,j}$           | Concentration of X in layer $j$ of the viable epidermis                    | $\text{cm}^{-3}$            |
| $A$                    | Surface area of a film or surface                                          | $\text{cm}^2$               |
| $AER$                  | Air exchange rate                                                          | $\text{s}^{-1}$             |
| $c_1$                  | Fraction of molecules adsorbed in the $C^*$ down configuration             |                             |
| $C_{g,i}$              | Gas-phase concentration of SVOC group $i$                                  | $\text{g cm}^{-3}$          |
| $C_{p,i}$              | Particle-phase concentration of SVOC group $i$                             | $\text{g cm}^{-3}$          |
| $C_{t,i}$              | Total airborne concentration of SVOC group $i$                             | $\text{g cm}^{-3}$          |
| $\delta$               | Thickness of a layer                                                       | $\text{cm}$                 |
| $D_{b,oil,X}$          | Diffusion coefficient of X in the skin oil                                 | $\text{cm}^2 \text{s}^{-1}$ |
| $D_{b,sc,X}$           | Diffusion coefficient of X in the stratum corneum                          | $\text{cm}^2 \text{s}^{-1}$ |
| $D_{b,ve,X}$           | Diffusion coefficient of X in the viable epidermis                         | $\text{cm}^2 \text{s}^{-1}$ |
| $D_{b,X}$              | Bulk diffusion coefficient of X                                            | $\text{cm}^2 \text{s}^{-1}$ |
| $\delta_{clothes}$     | Thickness of a clothing layer                                              | $\text{cm}$                 |
| $D_{g,eddy,j,X}$       | Gas-phase diffusion coefficient of molecule X in layer $j$ with turbulence | $\text{cm}^2 \text{s}^{-1}$ |
| $D_{g,X}$              | Gas-phase diffusion coefficient of molecule X                              | $\text{cm}^2 \text{s}^{-1}$ |

|                                 |                                                                                                                    |                      |
|---------------------------------|--------------------------------------------------------------------------------------------------------------------|----------------------|
| $\delta_{oil}$                  | Thickness of a skin oil layer                                                                                      | cm                   |
| $\delta_{sc}$                   | Thickness of a stratum corneum layer                                                                               | cm                   |
| $\delta_{ve}$                   | Thickness of a viable epidermis layer                                                                              | cm                   |
| $\delta_X$                      | Geometrical diameter of molecule $X$                                                                               | cm                   |
| $F_i$                           | Net flux of SVOC group $i$ to a surface film                                                                       | $g\ cm^{-2}\ s^{-1}$ |
| $F_{net}$                       | Net flux between the gas-phase and gas phase near the clothing                                                     | $cm^{-2}\ s^{-1}$    |
| $f_{om, TSP}$                   | Volume fraction of organic matter in the particles                                                                 |                      |
| $\gamma_X$                      | Uptake coefficient of $X$                                                                                          |                      |
| $h_{m,X}$                       | Mass transfer coefficient of $X$ associated with the flux from room air to the clothing                            | $cm\ s^{-1}$         |
| $J_{ads,X}$                     | Adsorption flux of molecule $X$ to a surface                                                                       | $cm^{-2}\ s^{-1}$    |
| $J_{b,s,X}$                     | Transport flux of $X$ from the bulk to the surface                                                                 | $cm^{-2}\ s^{-1}$    |
| $J_{bk,bk-1,X}$                 | Transport flux of $X$ from bulk layer $k$ to bulk layer $k-1$                                                      | $cm^{-2}\ s^{-1}$    |
| $J_{bl,clothes,X}$              | Transport flux of $X$ from the boundary layer to the gas-phase clothing                                            | $cm^{-2}\ s^{-1}$    |
| $J_{clothes,bl,X}$              | Transport flux of $X$ from the gas-phase clothing to the boundary layer                                            | $cm^{-2}\ s^{-1}$    |
| $J_{clothes,gap,X}$             | Transport flux of $X$ from the gas-phase clothing to the gap between the clothing and skin                         | $cm^{-2}\ s^{-1}$    |
| $J_{clothes,gas,X}$             | Transport flux of $X$ from the condensed-phase clothing to the gas-phase clothing                                  | $cm^{-2}\ s^{-1}$    |
| $J_{clothes,oil,X}$             | Contact transfer flux from the clothing to the skin oil                                                            | $cm^{-2}\ s^{-1}$    |
| $J_{clothes\ j,clothes\ j-1,X}$ | Transport flux of $X$ from gas-phase clothing layer $j$ to layer $j-1$                                             | $cm^{-2}\ s^{-1}$    |
| $J_{coll,X}$                    | Collision flux of molecule $X$ with a surface                                                                      | $cm^{-2}\ s^{-1}$    |
| $J_{des,X}$                     | Desorption flux of molecule $X$ with a surface                                                                     | $cm^{-2}\ s^{-1}$    |
| $J_{gap,clothes,X}$             | Transport flux of $X$ from the gap between the clothing and skin and the gas-phase clothing                        | $cm^{-2}\ s^{-1}$    |
| $J_{gap,mfp,X}$                 | Transport flux of $X$ from the gap between the clothing and skin and the gas phase next to the skin                | $cm^{-2}\ s^{-1}$    |
| $J_{gas,clothes,X}$             | Transport flux of $X$ from the gas-phase clothing to the condensed-phase clothing                                  | $cm^{-2}\ s^{-1}$    |
| $J_{mfp,gap,X}$                 | Transport flux of $X$ from the gap between the gas phase next to the skin to the gap between the clothing and skin | $cm^{-2}\ s^{-1}$    |
| $J_{oil,clothes,X}$             | Contact transfer flux from the skin oil to the clothing                                                            | $cm^{-2}\ s^{-1}$    |
| $J_{oil,s,X}$                   | Transport flux of $X$ from the skin oil to the surface                                                             | $cm^{-2}\ s^{-1}$    |
| $J_{oil,sc,X}$                  | Transport flux of $X$ from the skin oil to the stratum corneum                                                     | $cm^{-2}\ s^{-1}$    |
| $J_{oil\ j,oil\ j-1,X}$         | Transport flux of $X$ from the skin oil layer $j$ to layer $j-1$                                                   | $cm^{-2}\ s^{-1}$    |
| $J_{s,b,X}$                     | Transport flux from the surface to the bulk                                                                        | $cm^{-2}\ s^{-1}$    |
| $J_{sc,oil,X}$                  | Transport flux of $X$ from the stratum corneum to the skin oil                                                     | $cm^{-2}\ s^{-1}$    |

|                       |                                                                                                                               |                                                |
|-----------------------|-------------------------------------------------------------------------------------------------------------------------------|------------------------------------------------|
| $J_{sc,ve,X}$         | Transport flux of $X$ from the stratum corneum to the viable epidermis                                                        | $\text{cm}^{-2} \text{s}^{-1}$                 |
| $J_{sc\ j,sc\ j-1,X}$ | Transport flux of $X$ from the stratum corneum layer $j$ to layer $j-1$                                                       | $\text{cm}^{-2} \text{s}^{-1}$                 |
| $J_{ve,blood,X}$      | Transport flux of $X$ from the viable epidermis into the blood                                                                | $\text{cm}^{-2} \text{s}^{-1}$                 |
| $J_{ve,sc,X}$         | Transport flux of $X$ from the viable epidermis to the stratum corneum                                                        | $\text{cm}^{-2} \text{s}^{-1}$                 |
| $J_{ve\ j,ve\ j-1,X}$ | Transport flux of $X$ from the viable epidermis layer $j$ to layer $j-1$                                                      | $\text{cm}^{-2} \text{s}^{-1}$                 |
| $k_{a,X}$             | Adsorption rate of molecule $X$ on an adsorbate free surface                                                                  | $\text{cm s}^{-1}$                             |
| $k_{b,b,X}$           | Transport rate coefficient (velocity) of $X$ between bulk layers                                                              | $\text{cm s}^{-1}$                             |
| $k_{br}$              | Bulk reaction rate coefficient                                                                                                | $\text{s}^{-1}$ or $\text{cm}^3 \text{s}^{-1}$ |
| $k_{b,s,X}$           | Transport rate coefficient (velocity) of $X$ from the bulk to the surface                                                     | $\text{cm s}^{-1}$                             |
| $k_{bl,cl, X}$        | Transport rate coefficient (velocity) of $X$ between the boundary layer and the gas phase clothing layer                      | $\text{cm s}^{-1}$                             |
| $k_{cl,cl, X}$        | Transport rate coefficient (velocity) of $X$ between the gas-phase clothing layers                                            | $\text{cm s}^{-1}$                             |
| $k_{cl,cl, X}$        | Transport rate coefficient (velocity) of $X$ between the gas-phase clothing and the gap between the clothing and skin         | $\text{cm s}^{-1}$                             |
| $k_{cl,cl, X}$        | Transport rate coefficient (velocity) of $X$ from the condensed-phase clothing to the gas-phase clothing                      | $\text{cm s}^{-1}$                             |
| $k_{cl,cl, X}$        | Contact transfer coefficient (velocity) from the clothing to the skin oil                                                     | $\text{cm s}^{-1}$                             |
| $K_{cl, X}$           | Partitioning coefficient of $X$ to substances covering clothing fibres                                                        |                                                |
| $k_{d,X}$             | Desorption rate of molecule $X$ from the surface                                                                              | $\text{s}^{-1}$                                |
| $K_e$                 | Turbulence intensity                                                                                                          | $\text{s}^{-1}$                                |
| $k_{gr}$              | Gas phase reaction rate coefficient                                                                                           | $\text{s}^{-1}$ or $\text{cm}^3 \text{s}^{-1}$ |
| $k_{gap,mfp,X}$       | Transport rate coefficient (velocity) of $X$ between the gap between the clothing and skin and the gas phase next to the skin | $\text{cm s}^{-1}$                             |
| $k_{gas,cl, X}$       | Transport rate coefficient (velocity) of $X$ from the gas-phase clothing to the condensed-phase clothing                      | $\text{cm s}^{-1}$                             |
| $K_{oa,i}$            | Octanal-air partitioning coefficient for SVOC group $i$                                                                       |                                                |
| $k_{oil,cl, X}$       | Contact transfer coefficient (velocity) from the skin oil to the clothing                                                     | $\text{cm s}^{-1}$                             |
| $k_{oil,oil,X}$       | Transport rate coefficient (velocity) of $X$ between skin oil layers                                                          | $\text{cm s}^{-1}$                             |
| $k_{oil,s,X}$         | Transport rate coefficient (velocity) of $X$ from the surface to the first skin oil bulk layer                                | $\text{cm s}^{-1}$                             |
| $k_{oil,sc,X}$        | Transport rate coefficient (velocity) of $X$ between the skin oil and the stratum corneum                                     | $\text{cm s}^{-1}$                             |
| $K_{p,i}$             | Particle-air partitioning coefficient of SVOC group $i$                                                                       | $\text{cm}^3 \text{g}^{-1}$                    |
| $k_{room\ bl}$        | Transport rate coefficient (velocity) of $X$ between the gas phase in the room and the gas-phase in the boundary layer        | $\text{cm s}^{-1}$                             |

|                     |                                                                                               |                            |
|---------------------|-----------------------------------------------------------------------------------------------|----------------------------|
| $k_{s,b,X}$         | Transport rate coefficient of $X$ from the surface to the bulk                                | $s^{-1}$                   |
| $k_{s,oil,X}$       | Transport rate coefficient of $X$ from the surface to the skin oil                            | $s^{-1}$                   |
| $k_{sc,sc,X}$       | Transport rate coefficient (velocity) of $X$ between stratum corneum layers                   | $cm\ s^{-1}$               |
| $k_{sc,ve,X}$       | Transport rate coefficient (velocity) of $X$ between the stratum corneum and viable epidermis | $cm\ s^{-1}$               |
| $k_{sr}$            | Reaction rate coefficient for surface layer reactions                                         | $s^{-1}$ or $cm^2\ s^{-1}$ |
| $k_{ve,blood,X}$    | Transport rate coefficient (velocity) of $X$ from the viable epidermis into the blood         | $cm\ s^{-1}$               |
| $k_{ve,ve,X}$       | Transport rate coefficient (velocity) of $X$ between viable epidermis layers                  | $cm\ s^{-1}$               |
| $L$                 | Number of layers                                                                              |                            |
| $L_{bl,close}$      | Number of layers in the boundary layer close to the surface                                   |                            |
| $L_{bl,far}$        | Number of layers in the boundary layer further away from the surface                          |                            |
| $L_{clothes}$       | Number of layers in the clothing                                                              |                            |
| $L_{oil}$           | Number of layers in the skin oil                                                              |                            |
| $L_{sc}$            | Number of layers in the stratum corneum                                                       |                            |
| $L_{ve}$            | Number of layers in the viable epidermis                                                      |                            |
| $l_X$               | mean free path of molecule $X$                                                                | $cm$                       |
| $p$                 | Clothing porosity                                                                             | $cm^{-2}$                  |
| $P_{b,j,X}$         | Net production rate of species $X$ in layer $j$ of a bulk condensed phase                     | $cm^{-3}\ s^{-1}$          |
| $P_{g,clothes,j,X}$ | Net production rate of species $X$ in layer $j$ of the clothing gas phase                     | $cm^{-3}\ s^{-1}$          |
| $P_{g,X}$           | Net production rate of species $X$ in the gas phase                                           | $cm^{-3}\ s^{-1}$          |
| $p_i$               | Density of the condensed phase SVOC group $i$                                                 | $g\ cm^{-3}$               |
| $p_{part}$          | Density of airborne particles                                                                 | $g\ cm^{-3}$               |
| $P_{s,X}$           | Net production rate of species $X$ at a surface                                               | $cm^{-2}\ s^{-1}$          |
| $\theta$            | Surface coverage                                                                              |                            |
| $s_j$               | Surface area of layer $j$                                                                     | $cm^2$                     |
| $S_j$               | Surface area of the empty adsorption sites in layer $j$                                       | $cm^2$                     |
| $S_{people}$        | Surface area of the clothing                                                                  | $cm^2$                     |
| $\sigma_X$          | Effective molecular cross section of molecule $X$                                             | $cm^2$                     |
| $T_{BL}$            | Boundary layer thickness                                                                      | $cm$                       |
| $T_{clothes}$       | Total thickness of the clothing                                                               | $cm$                       |
| $T_{gap}$           | Total thickness of the gap between the clothing and the skin                                  | $cm$                       |
| $T_o$               | Initial film thickness                                                                        | $cm$                       |
| $T_{oil}$           | Total thickness of the skin oil                                                               | $cm$                       |

|                  |                                                                                     |              |
|------------------|-------------------------------------------------------------------------------------|--------------|
| $T_{sc}$         | Total thickness of the stratum corneum                                              | cm           |
| $TSP$            | Total airborne suspended particle concentration                                     | $g\ cm^{-3}$ |
| $T_t$            | Total film thickness                                                                | cm           |
| $T_{ve}$         | Total thickness of the viable epidermis                                             | cm           |
| $UF_j$           | Uncovered fraction of molecules in layer $j$                                        |              |
| $V_{clothes}$    | Volume of a layer in the clothing                                                   | $cm^3$       |
| $V_j$            | Volume of layer $j$                                                                 | $cm^3$       |
| $V_{oil}$        | Volume of a layer in the skin oil                                                   | $cm^3$       |
| $V_{room}$       | Volume of the room                                                                  | $cm^3$       |
| $V_{sc}$         | Volume of a layer in the stratum corneum                                            | $cm^3$       |
| $V_{ve}$         | Volume of a layer in the viable epidermis                                           | $cm^3$       |
| $V_X$            | Volume of one molecule of $X$                                                       | $cm^3$       |
| $x$              | Penetration depth                                                                   | cm           |
| $x_{b,i}$        | Length that a molecule in SVOC group $i$ must travel to be accommodated in the bulk | cm           |
| $x_{eff}$        | Effective penetration depth                                                         | cm           |
| $x_{eff}$        | Effective penetration depth                                                         | cm           |
| $\alpha(x)$      | Penetration depth dependent mass accommodation coefficient                          | $cm^{-3}$    |
| $\alpha_{b,i}$   | Bulk accommodation coefficient of a molecule in SVOC group $i$                      |              |
| $\alpha_{eff,i}$ | Effective mass accommodation coefficient of SVOC group $i$                          |              |
| $\alpha_{s,0,X}$ | Surface mass accommodation of molecule $X$ on an adsorbate free surface             |              |
| $\tau_{d,X}$     | Desorption lifetime of molecule $X$ on a surface                                    | s            |
| $v_{d,i}$        | Deposition velocity of SVOC group $i$                                               | $cm\ s^{-1}$ |
| $\omega_X$       | Mean thermal velocity of molecule $X$                                               | $cm\ s^{-1}$ |
